# Supplementary material for: Biochanin A alleviates gingival inflammation and alveolar bone loss in rats with experimental periodontitis
Source: PubMed Central journal article supplement — Exp Ther Med. 2020 Oct 23;20(6):251. doi: 10.3892/etm.2020.9381 (PMC7654219; doi:10.3892/etm.2020.9381), 2020-10-23
Supplement: Supplementary_Data.pdf [file Supplementary_Data.pdf]

Figure S1. Effects of BA on the viability of gingival fibroblasts. Gingival fibroblasts were treated with 0, 50, 100 and 150  $\mu\text{M}$  BA for 24 and 48 h, respectively. Cell cytotoxicity of BA was assessed by an MTT assay. Data are presented as the mean  $\pm$  SD. Con, concentration; BA, biochanin A.

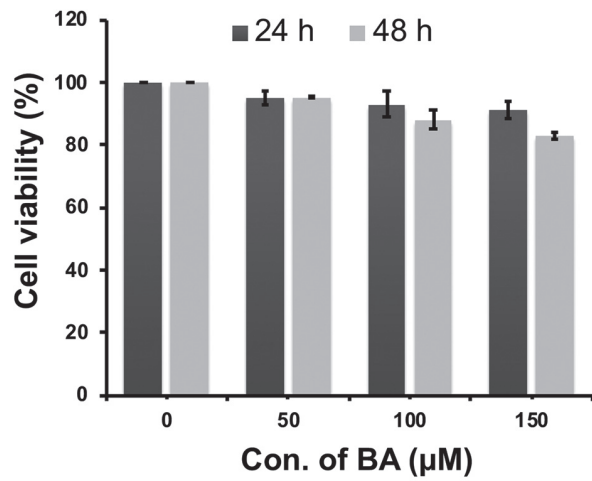

Table SI. Primers used in the present study.

| Gene          | Primer sequence (5' to 3') |                       |
|---------------|----------------------------|-----------------------|
|               | Forward                    | Reverse               |
| IL-1 $\beta$  | TTCGAGGCACAAGGCACAACA      | AGGTCCTGGAAGGAGCACTCA |
| TNF- $\alpha$ | CCTCCCTCTCATCAGTTCTA       | GGCAGCCTTGTCCTTGAC    |
| GAPDH         | TTTGGTATCGTGGAAGGACTC      | TAGAGGCAGGGATGATGTTCT |

IL, interleukin; TNF, tumor necrosis factor.
